# Supplementary material for: The DExH Box Helicase Domain of Spindle-E Is Necessary for Retrotransposon Silencing and Axial Patterning During Drosophila Oogenesis
Source: G3 (Bethesda). 2014 Sep 19;4(11):2247–57. doi: 10.1534/g3.114.014332 (PMC4232550; doi:10.1534/g3.114.014332)
Supplement: Supporting Information [file supp_g3.114.014332_FigureS3.pdf]

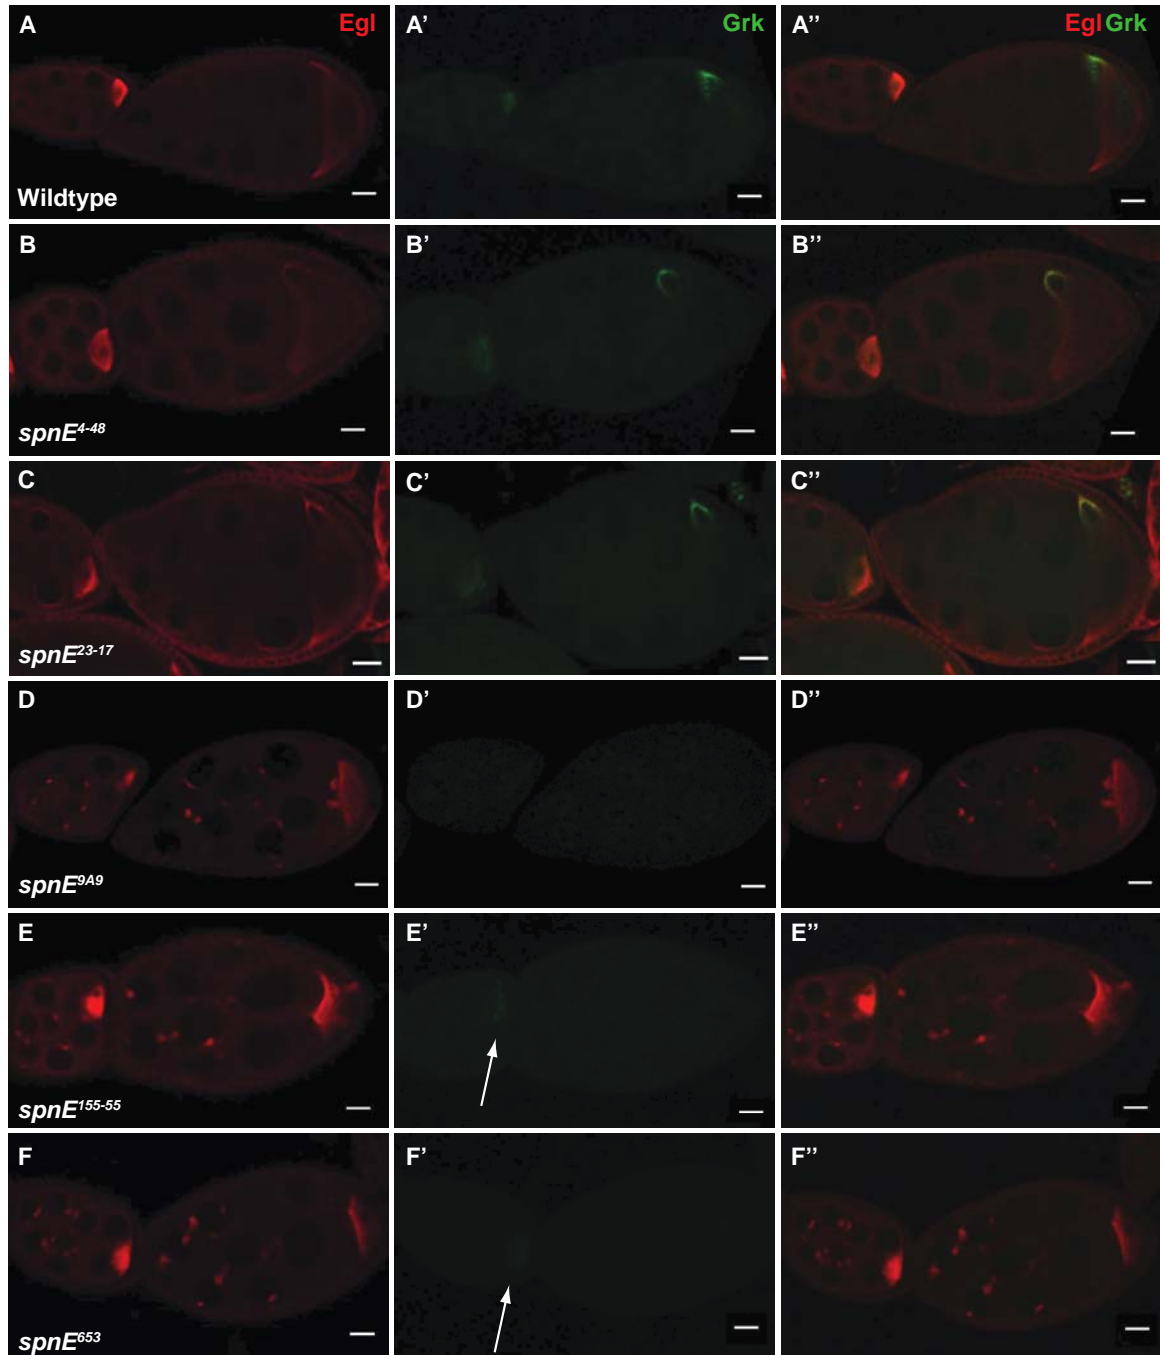

**Figure S3** Similar to homozygous *spn-E* mutant egg chambers, dynein motor complex aggregates form and Gurken is not properly localized in some *spn-E* hemizygous mutant ovaries. *spn-E<sup>mutant</sup>/spn-E<sup>Δ125</sup>* were stained with  $\alpha$ -EGL (**A-F**, Red) to visualize the dynein motor complex and  $\alpha$ -GRK (**A'-F'**, Green). (**A**) In wildtype (*spn-E<sup>Δ125</sup>/Balancer*) EGL localizes to and within the oocyte (**A**) and GRK forms a tight crescent at the dorsal-anterior corner of a stage 8-9 oocyte (**B**). (Egg chamber to the right of each panel). (**B,C**) In *spn-E<sup>4-48</sup>* and *spn-E<sup>23-17</sup>* no dynein aggregates form (**B,C**) and GRK is localized similar to wildtype (**B',C'**). These alleles represent the typical phenotype of the weaker *spn-E* alleles. (**D-F**) In *spn-E<sup>9A9</sup>*, *spn-E<sup>155-55</sup>*, and *spn-E<sup>653</sup>* dynein motor aggregates form (**D-F**) and GRK is not localized to the dorsal-anterior corner of the oocyte (**D'-F'**). These alleles represent the typical phenotype of the strong *spn-E* alleles. In the earlier chambers of *spn-E<sup>155-55</sup>* and *spn-E<sup>653</sup>* weak GRK expression is found within the oocyte (**E',F'**, arrow).
